# Supplementary material for: Factor Structure of the “Top Ten” Positive Emotions of Barbara Fredrickson
Source: Frontiers journal article supplement (doi:10.3389/fpsyg.2021.641804), 2021-05-14
Supplement: Data_Sheet_1.PDF [file Data_Sheet_1.PDF]

## Supplemental Material

### Sampling and data extraction – Details

The study was designed, using soscisurvey.de, a commonly used platform for online questionnaire design and administration, which offers its services freely for non-commercial research interests. The design included, apart from the reported emotions and demographics, further scales for different purposes, which have been the LOT-R, RS-13, TST, scale for cognitive coping (Moos, 1984) and the SWLS. Yet, emotions have been measured first, to avoid biases through the following scales. Demographic questions have been tied to the end of the study. The link for the study was spread through social media, namely different facebook groups (mostly bound to students from the University of Vienna) and by personal accounts. Also, seminar participants have been encouraged to share the link with friends and relatives. Data extraction was handled with Excel for Mac. Only complete cases have been considered in the further progress of the study and therefore no specific handling of missing values is reported.

### Descriptives

|                            | % (n)      |                                   | % (n)      |
|----------------------------|------------|-----------------------------------|------------|
| Gender                     |            | Active Sexlife                    |            |
| <i>Female</i>              | 62.2 (194) | <i>Yes</i>                        | 58.3 (182) |
| <i>Male</i>                | 37.2 (116) | <i>No</i>                         | 41.7 (130) |
| <i>Other</i>               | 0.6 (2)    |                                   |            |
| Education                  |            | Mothertongue                      |            |
| <i>Not university</i>      | 7.7 (24)   | <i>German</i>                     | 87.8 (274) |
| <i>Currently studying</i>  | 47.1 (147) | <i>Other</i>                      | 4.5 (14)   |
| <i>Finished studying</i>   | 45.2 (141) | <i>German &amp; other</i>         | 7.7 (24)   |
| Income (subjective)        |            | Mothertongue parents              |            |
| <i>Not enough</i>          | 15.4 (48)  | <i>German</i>                     | 83.0 (259) |
| <i>Enough</i>              | 60.9 (190) | <i>Other</i>                      | 9.9 (31)   |
| <i>More than enough</i>    | 23.7 (74)  | <i>German &amp; other</i>         | 7.1 (22)   |
| Income (objective in Euro) |            | Religion                          |            |
| <i>0 – 500</i>             | 11.5 (36)  | <i>Christian</i>                  | 41.3 (129) |
| <i>501 – 1.000</i>         | 27.6 (86)  | <i>Jewish</i>                     | 0.3 (1)    |
| <i>1.001 – 1.500</i>       | 14.1 (44)  | <i>Muslim</i>                     | 1.3 (4)    |
| <i>1.501 – 2.000</i>       | 11.9 (37)  | <i>Atheist</i>                    | 24.4 (76)  |
| <i>2.001 – 2.500</i>       | 16.7 (52)  | <i>Other</i>                      | 4.8 (15)   |
| <i>&gt; 2.500</i>          | 18.3 (57)  | <i>None</i>                       | 27.9 (87)  |
| Relationship               |            | Housing                           |            |
| <i>Monogamous</i>          | 57.7 (180) | <i>Alone</i>                      | 18.9 (59)  |
| <i>Open relationship</i>   | 2.6 (8)    | <i>Flatshare</i>                  | 34.3 (107) |
| <i>Other concepts</i>      | 4.5 (14)   | <i>With family (e.g. Parents)</i> | 12.8 (40)  |
| <i>Single</i>              | 35.3 (110) | <i>With Partner</i>               | 30.1 (94)  |
|                            |            | <i>Other</i>                      | 3.8 (12)   |

**Exact p-values of Correlation Table**

|                    | 1 | 2                   | 3       | 4       | 5       | 6       | 7       | 8       | 9       | 10      |
|--------------------|---|---------------------|---------|---------|---------|---------|---------|---------|---------|---------|
| <b>Amusement</b>   |   | 0.091 <sup>ns</sup> | <.00001 | <.00001 | <.00001 | <.00001 | <.00001 | <.00001 | <.00001 | <.00001 |
| <b>Awe</b>         |   |                     | 0.00028 | 0.01565 | 0.00011 | <.00001 | 0.04215 | 0.03516 | 0.01454 | 0.0034  |
| <b>Gratitude</b>   |   |                     |         | <.00001 | <.00001 | <.00001 | <.00001 | <.00001 | <.00001 | <.00001 |
| <b>Hope</b>        |   |                     |         |         | <.00001 | <.00001 | <.00001 | <.00001 | <.00001 | <.00001 |
| <b>Interest</b>    |   |                     |         |         |         | <.00001 | <.00001 | <.00001 | <.00001 | <.00001 |
| <b>Joy</b>         |   |                     |         |         |         |         | <.00001 | <.00001 | <.00001 | <.00001 |
| <b>Love</b>        |   |                     |         |         |         |         |         | <.00001 | <.00001 | 0.00153 |
| <b>Pride</b>       |   |                     |         |         |         |         |         |         | <.00001 | <.00001 |
| <b>Serenity</b>    |   |                     |         |         |         |         |         |         |         | <.00001 |
| <b>Inspiration</b> |   |                     |         |         |         |         |         |         |         |         |

**List of Eigenvalues**

| ID | Eigenvalues |
|----|-------------|
| 1  | 3.75        |
| 2  | 0.33        |
| 3  | 0.18        |
| 4  | 0.12        |
| 5  | 0.03        |
| 6  | -0.03       |
| 7  | -0.09       |
| 8  | -0.14       |
| 9  | -0.18       |
| 10 | -0.23       |

## Emotions – English and German

| English     | German      |
|-------------|-------------|
| Amusement   | Vergnügen   |
| Awe         | Ehrfurcht   |
| Gratitude   | Dankbarkeit |
| Hope        | Hoffnung    |
| Interest    | Interesse   |
| Joy         | Freude      |
| Love        | Liebe       |
| Pride       | Stolz       |
| Serenity    | Heiterkeit  |
| Inspiration | Inspiration |
